# Supplementary figures and images for: Geometric stability and reaction activity of Pt clusters adsorbed graphene substrates for catalytic CO oxidation
Source: Royal Society of Chemistry journal article supplement (doi:10.1039/c5cp00052a), 2015-01-01

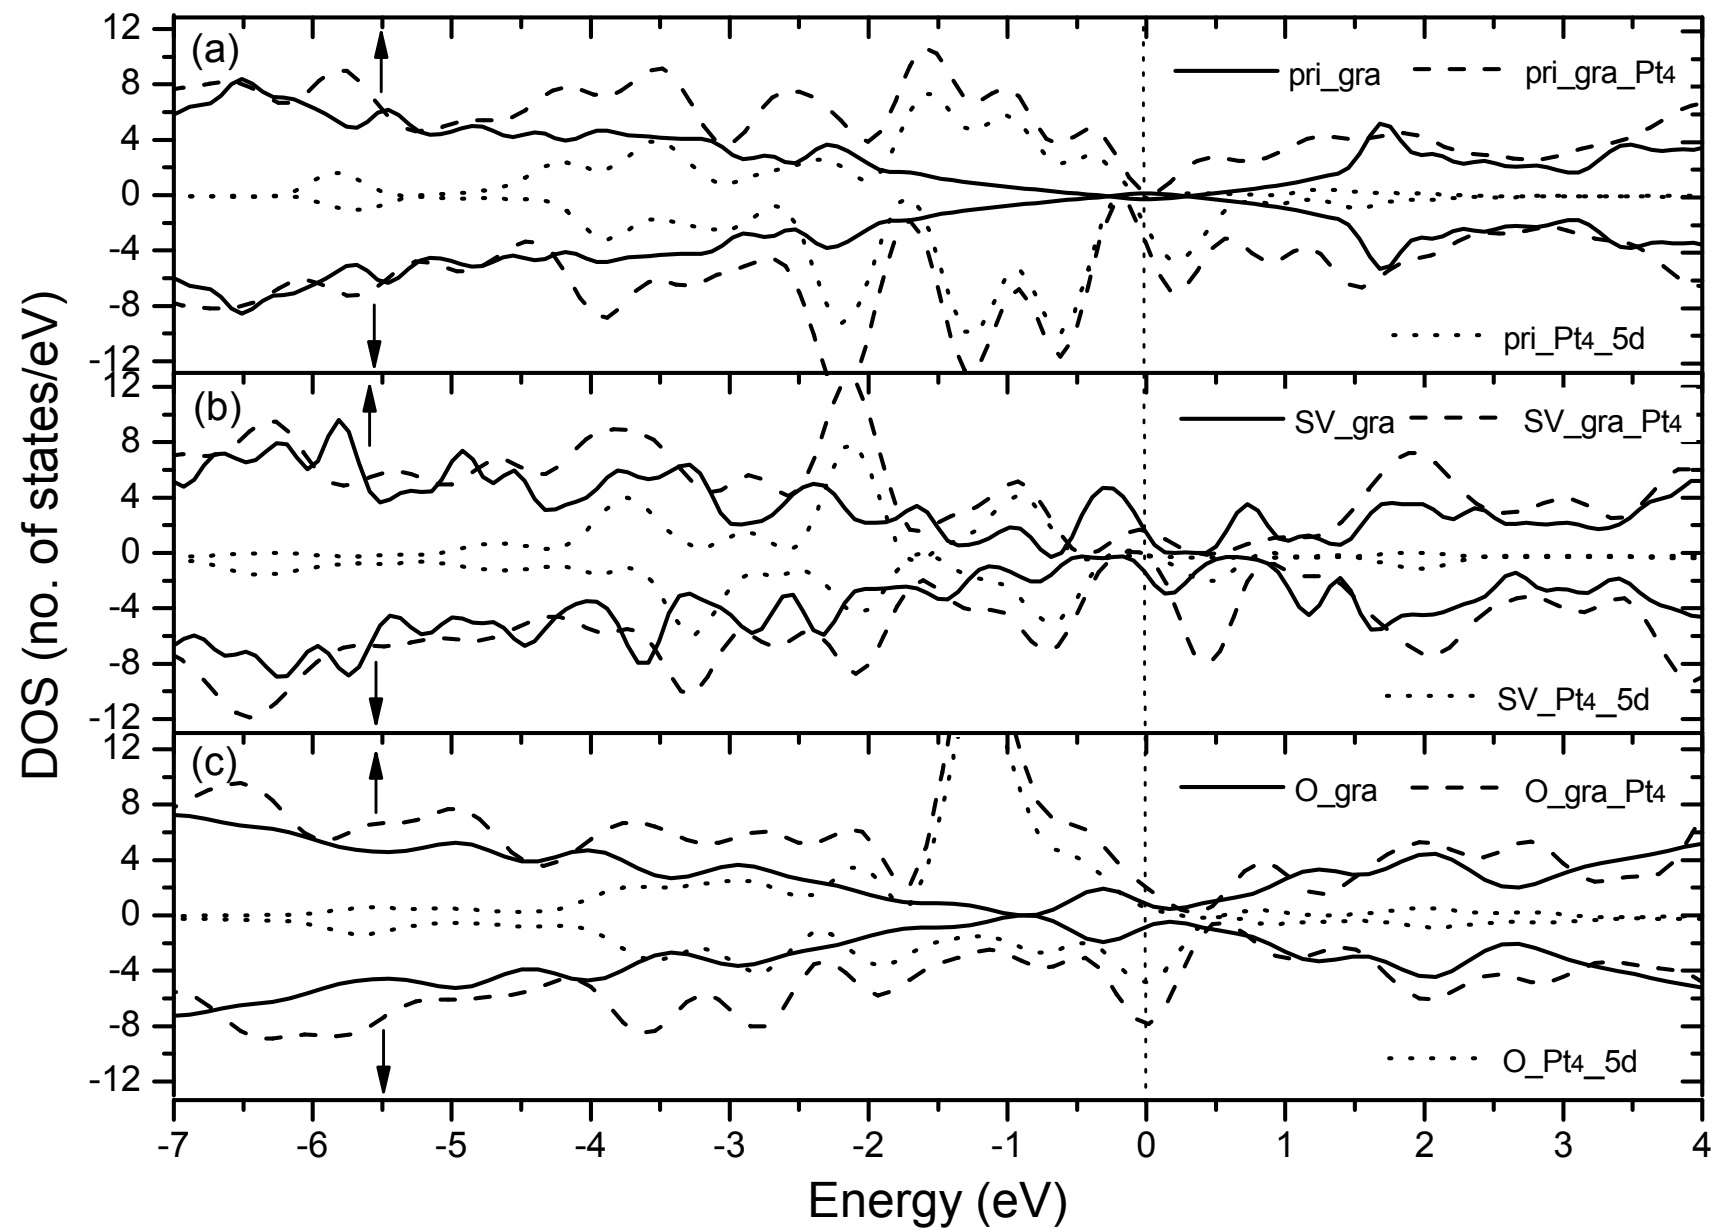

Fig. S1.

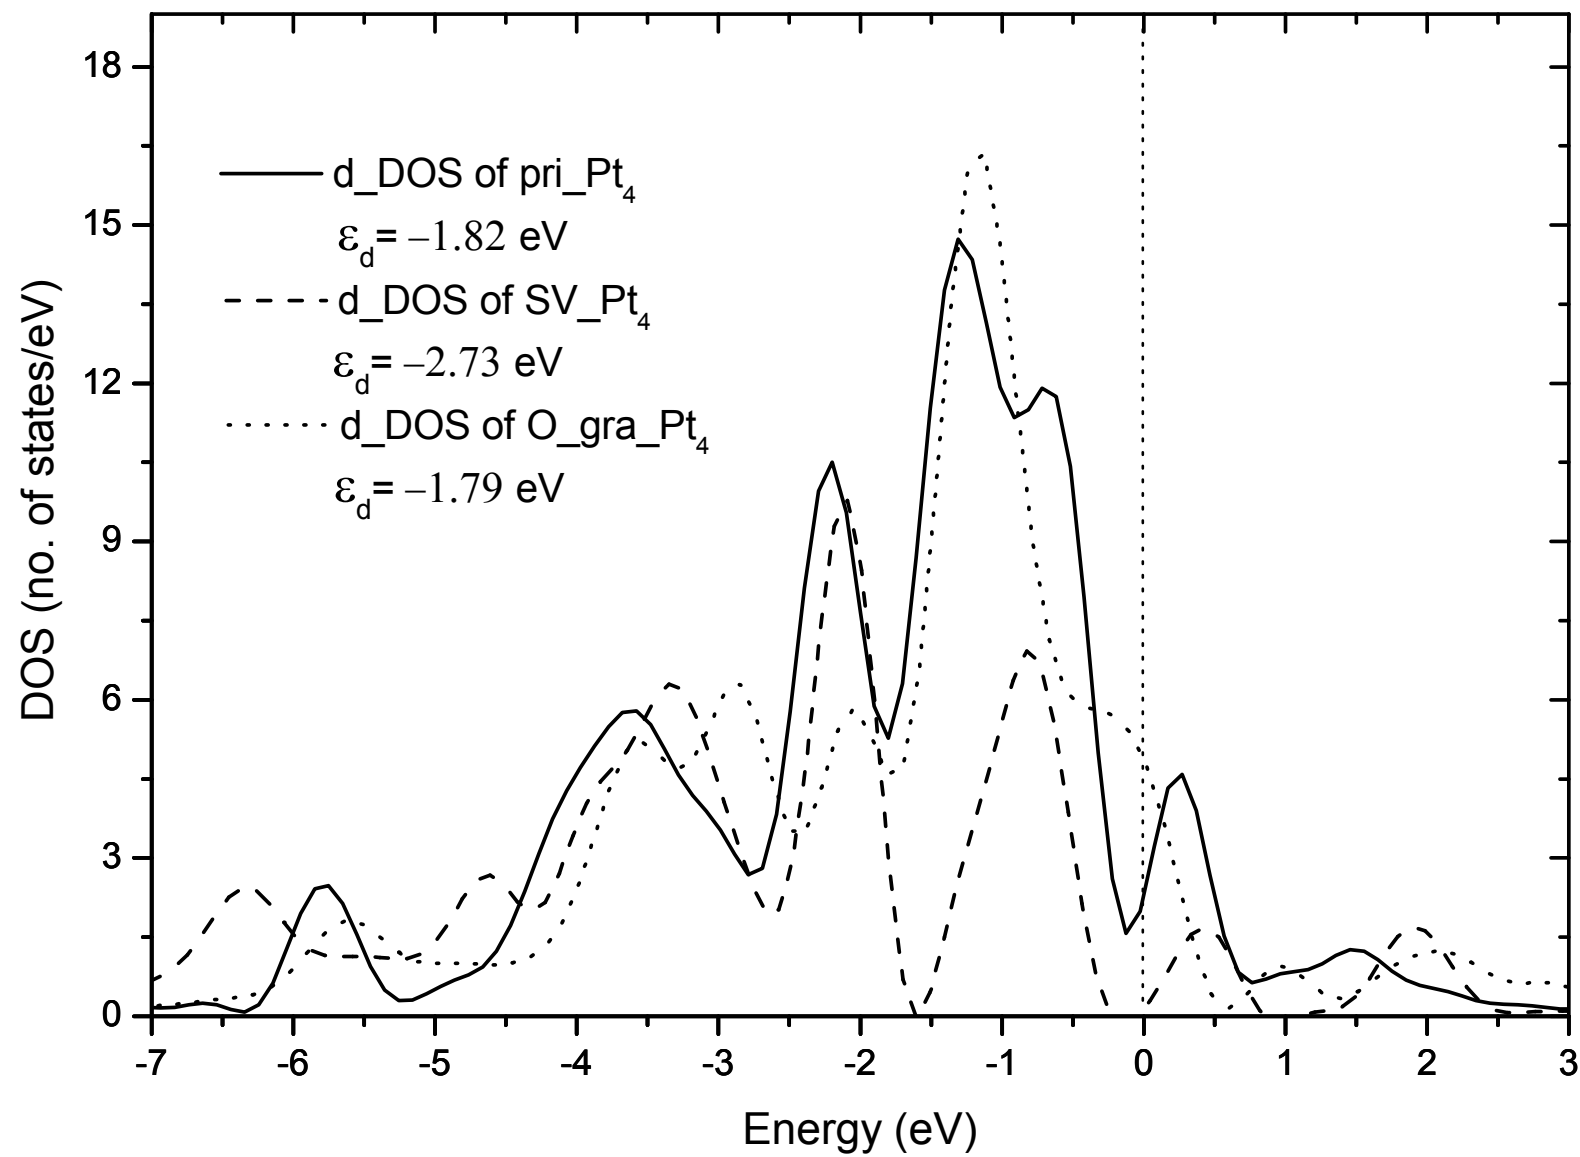

Fig. S2.

Supplement: c5cp00052a1.pdf [file c5cp00052a1.pdf]
